# Supplementary material
Source: publisher figshare collection journal article supplement (https://acs.figshare.com/ndownloader/files/4268260)
Supplement: Supplementary file 1 [file 4268260]

  
data_04320 
  
_audit_creation_method            SHELXL-97 
_chemical_name_systematic 
; 
 ? 
; 
_chemical_name_common             04320 
_chemical_melting_point           ? 
_chemical_formula_moiety          'C25 H44 O4 Si' 
_chemical_formula_sum             'C25 H44 O4 Si' 
_chemical_formula_weight          436.69 
  
loop_ 
 _atom_type_symbol 
 _atom_type_description 
 _atom_type_scat_dispersion_real 
 _atom_type_scat_dispersion_imag 
 _atom_type_scat_source 
 'C'  'C'   0.0033   0.0016 
 'International Tables Vol C Tables 4.2.6.8 and 6.1.1.4' 
 'H'  'H'   0.0000   0.0000 
 'International Tables Vol C Tables 4.2.6.8 and 6.1.1.4' 
 'O'  'O'   0.0106   0.0060 
 'International Tables Vol C Tables 4.2.6.8 and 6.1.1.4' 
 'Si'  'Si'   0.0817   0.0704 
 'International Tables Vol C Tables 4.2.6.8 and 6.1.1.4' 
  
_symmetry_cell_setting            triclinic 
_symmetry_space_group_name_H-M    P-1 
  
loop_ 
 _symmetry_equiv_pos_as_xyz 
 'x, y, z' 
 '-x, -y, -z' 
  
_cell_length_a                    9.4004(7) 
_cell_length_b                    10.2614(8) 
_cell_length_c                    13.271(1) 
_cell_angle_alpha                 101.813(1) 
_cell_angle_beta                  93.644(1) 
_cell_angle_gamma                 94.256(1) 
_cell_volume                      1245.5(2) 
_cell_formula_units_Z             2 
_cell_measurement_temperature     173(2) 
_cell_measurement_reflns_used     2890 
_cell_measurement_theta_min       2.30 
_cell_measurement_theta_max       27.52 
  
_exptl_crystal_description        block 
_exptl_crystal_colour             colorless 
_exptl_crystal_size_max           0.32 
_exptl_crystal_size_mid           0.24 
_exptl_crystal_size_min           0.16 
_exptl_crystal_density_meas       ? 
_exptl_crystal_density_diffrn     1.164 
_exptl_crystal_density_method     'not measured' 
_exptl_crystal_F_000              480 
_exptl_absorpt_coefficient_mu     0.121 
_exptl_absorpt_correction_type    multi-scan 
_exptl_absorpt_correction_T_min   0.9622 
_exptl_absorpt_correction_T_max   0.9809 
_exptl_absorpt_process_details    'SADABS, R. Blessing, 1995' 
  
_exptl_special_details 
; 
 ? 
; 
  
_diffrn_ambient_temperature       173(2) 
_diffrn_radiation_wavelength      0.71073 
_diffrn_radiation_type            MoK\a 
_diffrn_radiation_source          'normal-focus sealed tube' 
_diffrn_radiation_monochromator   graphite 
_diffrn_measurement_device_type   'Bruker SMART Platform CCD' 
_diffrn_measurement_method        'area detector, \w scans per \f' 
_diffrn_detector_area_resol_mean  ? 
_diffrn_standards_number          ? 
_diffrn_standards_interval_count  ? 
_diffrn_standards_interval_time   ? 
_diffrn_standards_decay_%         ? 
_diffrn_reflns_number             15061 
_diffrn_reflns_av_R_equivalents   0.0286 
_diffrn_reflns_av_sigmaI/netI     0.0316 
_diffrn_reflns_limit_h_min        -12 
_diffrn_reflns_limit_h_max        12 
_diffrn_reflns_limit_k_min        -13 
_diffrn_reflns_limit_k_max        13 
_diffrn_reflns_limit_l_min        -17 
_diffrn_reflns_limit_l_max        17 
_diffrn_reflns_theta_min          1.57 
_diffrn_reflns_theta_max          27.53 
_reflns_number_total              5696 
_reflns_number_gt                 4766 
_reflns_threshold_expression      >2sigma(I) 
  
_computing_data_collection        'SMART, Bruker' 
_computing_cell_refinement        'SAINT, Bruker' 
_computing_data_reduction         'SAINT, Bruker' 
_computing_structure_solution     'SIR97' 
_computing_structure_refinement   'SHELXL-97 (Sheldrick, 1997)' 
_computing_molecular_graphics     'SHELXTL, Bruker' 
_computing_publication_material   'Bruker SHELXTL' 
  
_refine_special_details 
; 
 Refinement of F^2^ against ALL reflections.  The weighted R-factor wR and 
 goodness of fit S are based on F^2^, conventional R-factors R are based 
 on F, with F set to zero for negative F^2^. The threshold expression of 
 F^2^ > 2sigma(F^2^) is used only for calculating R-factors(gt) etc. and is 
 not relevant to the choice of reflections for refinement.  R-factors based 
 on F^2^ are statistically about twice as large as those based on F, and R- 
 factors based on ALL data will be even larger. 
; 
  
_refine_ls_structure_factor_coef  Fsqd 
_refine_ls_matrix_type            full 
_refine_ls_weighting_scheme       calc 
_refine_ls_weighting_details 
 'calc w=1/[\s^2^(Fo^2^)+(0.0612P)^2^+0.3984P] where P=(Fo^2^+2Fc^2^)/3' 
_atom_sites_solution_primary      direct 
_atom_sites_solution_secondary    difmap 
_atom_sites_solution_hydrogens    geom 
_refine_ls_hydrogen_treatment     refall 
_refine_ls_extinction_method      none 
_refine_ls_extinction_coef        ? 
_refine_ls_number_reflns          5696 
_refine_ls_number_parameters      447 
_refine_ls_number_restraints      0 
_refine_ls_R_factor_all           0.0503 
_refine_ls_R_factor_gt            0.0401 
_refine_ls_wR_factor_ref          0.1130 
_refine_ls_wR_factor_gt           0.1031 
_refine_ls_goodness_of_fit_ref    1.021 
_refine_ls_restrained_S_all       1.021 
_refine_ls_shift/su_max           0.000 
_refine_ls_shift/su_mean          0.000 
  
loop_ 
 _atom_site_label 
 _atom_site_type_symbol 
 _atom_site_fract_x 
 _atom_site_fract_y 
 _atom_site_fract_z 
 _atom_site_U_iso_or_equiv 
 _atom_site_adp_type 
 _atom_site_occupancy 
 _atom_site_symmetry_multiplicity 
 _atom_site_calc_flag 
 _atom_site_refinement_flags 
 _atom_site_disorder_assembly 
 _atom_site_disorder_group 
Si1 Si 0.60610(4) 0.77634(4) 0.35489(3) 0.02322(11) Uani 1 1 d . . . 
O1 O 0.76929(11) 0.34231(10) 0.33614(8) 0.0326(2) Uani 1 1 d . . . 
O2 O 1.00030(9) 0.52086(9) 0.16380(7) 0.02123(19) Uani 1 1 d . . . 
O3 O 0.82036(12) 0.59468(11) 0.44961(7) 0.0327(2) Uani 1 1 d . . . 
H3O H 0.775(3) 0.508(3) 0.429(2) 0.085(8) Uiso 1 1 d . . . 
O4 O 0.75148(10) 0.74561(9) 0.29327(7) 0.0248(2) Uani 1 1 d . . . 
C1 C 0.88706(14) 0.34803(13) 0.30261(10) 0.0232(3) Uani 1 1 d . . . 
C2 C 0.94392(15) 0.22147(13) 0.24131(10) 0.0253(3) Uani 1 1 d . . . 
C3 C 1.05533(14) 0.25220(13) 0.16625(11) 0.0253(3) Uani 1 1 d . . . 
H3A H 1.0018(17) 0.2781(16) 0.1091(12) 0.024(4) Uiso 1 1 d . . . 
C4 C 1.16103(14) 0.37345(14) 0.21303(11) 0.0256(3) Uani 1 1 d . . . 
H4A H 1.2197(18) 0.3555(16) 0.2697(13) 0.029(4) Uiso 1 1 d . . . 
H4B H 1.2220(17) 0.3918(16) 0.1606(13) 0.028(4) Uiso 1 1 d . . . 
C5 C 1.08403(13) 0.49707(13) 0.25090(10) 0.0219(3) Uani 1 1 d . . . 
H5A H 1.1521(15) 0.5726(15) 0.2787(11) 0.017(3) Uiso 1 1 d . . . 
C6 C 0.98715(14) 0.47668(13) 0.33506(10) 0.0220(3) Uani 1 1 d . . . 
H6A H 1.0438(17) 0.4645(15) 0.3906(12) 0.025(4) Uiso 1 1 d . . . 
C7 C 0.90773(14) 0.60192(13) 0.36692(10) 0.0230(3) Uani 1 1 d . . . 
H7A H 0.9776(18) 0.6794(17) 0.3952(13) 0.032(4) Uiso 1 1 d . . . 
C8 C 0.82180(13) 0.62636(12) 0.27202(9) 0.0201(2) Uani 1 1 d . . . 
H8A H 0.7506(16) 0.5486(15) 0.2468(11) 0.020(4) Uiso 1 1 d . . . 
C9 C 0.91718(13) 0.63532(12) 0.18236(10) 0.0212(3) Uani 1 1 d . . . 
C10 C 0.82555(15) 0.62485(14) 0.08051(10) 0.0260(3) Uani 1 1 d . . . 
H10A H 0.8916(17) 0.6106(16) 0.0264(13) 0.027(4) Uiso 1 1 d . . . 
H10B H 0.7881(17) 0.7102(16) 0.0820(12) 0.025(4) Uiso 1 1 d . . . 
C11 C 0.70096(15) 0.51515(15) 0.05417(11) 0.0285(3) Uani 1 1 d . . . 
H11A H 0.6258(17) 0.5351(16) 0.0996(13) 0.026(4) Uiso 1 1 d . . . 
H11B H 0.659(2) 0.5189(18) -0.0135(15) 0.042(5) Uiso 1 1 d . . . 
C12 C 0.74526(15) 0.37678(14) 0.05129(10) 0.0268(3) Uani 1 1 d . . . 
H12A H 0.8300(18) 0.3578(17) 0.0163(13) 0.032(4) Uiso 1 1 d . . . 
C13 C 0.68389(15) 0.27950(14) 0.09096(11) 0.0287(3) Uani 1 1 d . . . 
C14 C 0.74961(16) 0.14807(14) 0.08302(12) 0.0321(3) Uani 1 1 d . . . 
H14A H 0.8199(18) 0.1404(17) 0.0304(13) 0.031(4) Uiso 1 1 d . . . 
H14B H 0.673(2) 0.0747(19) 0.0590(14) 0.042(5) Uiso 1 1 d . . . 
C15 C 0.81787(16) 0.12230(14) 0.18469(12) 0.0315(3) Uani 1 1 d . . . 
H15A H 0.8525(19) 0.0364(19) 0.1701(14) 0.037(4) Uiso 1 1 d . . . 
H15B H 0.744(2) 0.1188(18) 0.2341(14) 0.039(5) Uiso 1 1 d . . . 
C16 C 1.0127(2) 0.16091(16) 0.32842(13) 0.0366(3) Uani 1 1 d . . . 
H16A H 0.942(2) 0.141(2) 0.3713(16) 0.047(5) Uiso 1 1 d . . . 
H16B H 1.092(2) 0.221(2) 0.3716(16) 0.050(5) Uiso 1 1 d . . . 
H16C H 1.050(2) 0.076(2) 0.2985(15) 0.049(5) Uiso 1 1 d . . . 
C17 C 1.13592(19) 0.13131(16) 0.12207(14) 0.0379(4) Uani 1 1 d . . . 
H17A H 1.192(2) 0.1503(19) 0.0659(15) 0.046(5) Uiso 1 1 d . . . 
H17B H 1.071(2) 0.052(2) 0.0958(16) 0.050(5) Uiso 1 1 d . . . 
H17C H 1.205(2) 0.1106(19) 0.1749(15) 0.045(5) Uiso 1 1 d . . . 
C18 C 0.54518(17) 0.28777(19) 0.14223(15) 0.0392(4) Uani 1 1 d . . . 
H18A H 0.512(2) 0.370(3) 0.1499(18) 0.065(7) Uiso 1 1 d . . . 
H18B H 0.550(2) 0.257(2) 0.2054(19) 0.061(6) Uiso 1 1 d . . . 
H18C H 0.468(3) 0.231(2) 0.097(2) 0.072(7) Uiso 1 1 d . . . 
C19 C 1.01609(16) 0.76479(14) 0.20429(12) 0.0295(3) Uani 1 1 d . . . 
H19A H 1.070(2) 0.768(2) 0.1466(16) 0.050(5) Uiso 1 1 d . . . 
H19B H 1.083(2) 0.7707(19) 0.2652(15) 0.042(5) Uiso 1 1 d . . . 
H19C H 0.9609(19) 0.8400(19) 0.2162(14) 0.038(5) Uiso 1 1 d . . . 
C20 C 0.48759(16) 0.61947(16) 0.34964(12) 0.0323(3) Uani 1 1 d . . . 
H20A H 0.428(2) 0.598(2) 0.2838(16) 0.049(5) Uiso 1 1 d . . . 
H20B H 0.542(2) 0.545(2) 0.3515(16) 0.054(6) Uiso 1 1 d . . . 
C21 C 0.3896(2) 0.6282(2) 0.43734(14) 0.0470(4) Uani 1 1 d . . . 
H21A H 0.332(2) 0.544(2) 0.4312(16) 0.057(6) Uiso 1 1 d . . . 
H21B H 0.323(3) 0.705(2) 0.4394(18) 0.065(7) Uiso 1 1 d . . . 
H21C H 0.442(2) 0.643(2) 0.5032(19) 0.066(7) Uiso 1 1 d . . . 
C22 C 0.65456(15) 0.86752(15) 0.49107(11) 0.0287(3) Uani 1 1 d . . . 
H22A H 0.568(2) 0.8988(19) 0.5198(14) 0.042(5) Uiso 1 1 d . . . 
H22B H 0.6829(19) 0.8060(19) 0.5297(14) 0.038(5) Uiso 1 1 d . . . 
C23 C 0.76753(19) 0.98513(18) 0.50129(14) 0.0397(4) Uani 1 1 d . . . 
H23A H 0.792(2) 1.029(2) 0.5735(17) 0.055(6) Uiso 1 1 d . . . 
H23B H 0.735(2) 1.049(2) 0.4646(16) 0.046(5) Uiso 1 1 d . . . 
H23C H 0.855(2) 0.960(2) 0.4734(16) 0.048(5) Uiso 1 1 d . . . 
C24 C 0.51127(17) 0.89003(17) 0.28533(12) 0.0338(3) Uani 1 1 d . . . 
H24A H 0.424(2) 0.905(2) 0.3164(16) 0.052(6) Uiso 1 1 d . . . 
H24B H 0.568(2) 0.979(2) 0.3008(14) 0.044(5) Uiso 1 1 d . . . 
C25 C 0.4799(3) 0.8406(3) 0.16943(15) 0.0610(6) Uani 1 1 d . . . 
H25A H 0.427(3) 0.902(2) 0.1389(19) 0.069(7) Uiso 1 1 d . . . 
H25B H 0.423(3) 0.757(3) 0.156(2) 0.078(8) Uiso 1 1 d . . . 
H25C H 0.559(3) 0.820(3) 0.137(2) 0.080(8) Uiso 1 1 d . . . 
  
loop_ 
 _atom_site_aniso_label 
 _atom_site_aniso_U_11 
 _atom_site_aniso_U_22 
 _atom_site_aniso_U_33 
 _atom_site_aniso_U_23 
 _atom_site_aniso_U_13 
 _atom_site_aniso_U_12 
Si1 0.02188(18) 0.02641(19) 0.02082(18) 0.00147(13) 0.00512(13) 0.00552(14) 
O1 0.0330(5) 0.0311(5) 0.0347(5) 0.0070(4) 0.0136(4) 0.0002(4) 
O2 0.0220(4) 0.0221(4) 0.0207(4) 0.0046(3) 0.0046(3) 0.0064(3) 
O3 0.0420(6) 0.0375(6) 0.0197(5) 0.0048(4) 0.0097(4) 0.0086(5) 
O4 0.0270(5) 0.0231(5) 0.0263(5) 0.0055(4) 0.0100(4) 0.0083(4) 
C1 0.0280(6) 0.0236(6) 0.0196(6) 0.0078(5) 0.0029(5) 0.0034(5) 
C2 0.0295(7) 0.0210(6) 0.0262(6) 0.0059(5) 0.0024(5) 0.0038(5) 
C3 0.0251(6) 0.0234(6) 0.0271(7) 0.0032(5) 0.0028(5) 0.0065(5) 
C4 0.0203(6) 0.0270(7) 0.0299(7) 0.0053(5) 0.0029(5) 0.0063(5) 
C5 0.0189(6) 0.0220(6) 0.0243(6) 0.0035(5) 0.0011(5) 0.0020(5) 
C6 0.0238(6) 0.0246(6) 0.0176(6) 0.0044(5) -0.0003(5) 0.0044(5) 
C7 0.0261(6) 0.0239(6) 0.0186(6) 0.0023(5) 0.0044(5) 0.0032(5) 
C8 0.0217(6) 0.0191(6) 0.0201(6) 0.0032(4) 0.0057(5) 0.0048(5) 
C9 0.0229(6) 0.0209(6) 0.0215(6) 0.0057(5) 0.0064(5) 0.0059(5) 
C10 0.0314(7) 0.0290(7) 0.0212(6) 0.0095(5) 0.0070(5) 0.0104(6) 
C11 0.0273(7) 0.0370(8) 0.0218(6) 0.0062(5) -0.0005(5) 0.0092(6) 
C12 0.0247(6) 0.0323(7) 0.0210(6) -0.0003(5) -0.0011(5) 0.0053(5) 
C13 0.0240(6) 0.0314(7) 0.0267(7) -0.0018(5) -0.0030(5) 0.0022(5) 
C14 0.0296(7) 0.0260(7) 0.0359(8) -0.0028(6) -0.0007(6) -0.0010(6) 
C15 0.0340(8) 0.0212(7) 0.0387(8) 0.0055(6) 0.0027(6) 0.0000(6) 
C16 0.0460(9) 0.0303(8) 0.0371(8) 0.0147(6) 0.0003(7) 0.0089(7) 
C17 0.0384(8) 0.0287(8) 0.0457(9) 0.0008(7) 0.0095(7) 0.0105(7) 
C18 0.0251(7) 0.0415(9) 0.0501(10) 0.0074(8) 0.0054(7) 0.0019(7) 
C19 0.0310(7) 0.0240(7) 0.0355(8) 0.0086(6) 0.0108(6) 0.0027(6) 
C20 0.0280(7) 0.0352(8) 0.0314(7) 0.0022(6) 0.0063(6) -0.0017(6) 
C21 0.0440(10) 0.0593(12) 0.0334(9) 0.0046(8) 0.0113(7) -0.0155(9) 
C22 0.0286(7) 0.0326(7) 0.0235(6) 0.0006(5) 0.0044(5) 0.0073(6) 
C23 0.0386(9) 0.0369(9) 0.0392(9) -0.0001(7) -0.0006(7) -0.0002(7) 
C24 0.0333(8) 0.0395(8) 0.0297(7) 0.0049(6) 0.0041(6) 0.0156(7) 
C25 0.0796(16) 0.0714(15) 0.0328(9) 0.0060(9) -0.0086(10) 0.0371(13) 
  
_geom_special_details 
; 
 All esds (except the esd in the dihedral angle between two l.s. planes) 
 are estimated using the full covariance matrix.  The cell esds are taken 
 into account individually in the estimation of esds in distances, angles 
 and torsion angles; correlations between esds in cell parameters are only 
 used when they are defined by crystal symmetry.  An approximate (isotropic) 
 treatment of cell esds is used for estimating esds involving l.s. planes. 
; 
  
loop_ 
 _geom_bond_atom_site_label_1 
 _geom_bond_atom_site_label_2 
 _geom_bond_distance 
 _geom_bond_site_symmetry_2 
 _geom_bond_publ_flag 
Si1 O4 1.6541(9) . ? 
Si1 C22 1.8679(14) . ? 
Si1 C24 1.8704(15) . ? 
Si1 C20 1.8749(15) . ? 
O1 C1 1.2210(16) . ? 
O2 C5 1.4295(15) . ? 
O2 C9 1.4467(14) . ? 
O3 C7 1.4225(15) . ? 
O3 H3O 0.93(3) . ? 
O4 C8 1.4199(14) . ? 
C1 C6 1.5313(18) . ? 
C1 C2 1.5362(18) . ? 
C2 C15 1.5489(19) . ? 
C2 C16 1.5490(19) . ? 
C2 C3 1.5495(19) . ? 
C3 C4 1.5305(19) . ? 
C3 C17 1.5344(19) . ? 
C3 H3A 0.976(16) . ? 
C4 C5 1.5189(18) . ? 
C4 H4A 0.960(17) . ? 
C4 H4B 0.968(17) . ? 
C5 C6 1.5223(17) . ? 
C5 H5A 0.962(15) . ? 
C6 C7 1.5323(17) . ? 
C6 H6A 0.916(16) . ? 
C7 C8 1.5269(17) . ? 
C7 H7A 0.986(17) . ? 
C8 C9 1.5480(16) . ? 
C8 H8A 0.990(15) . ? 
C9 C19 1.5290(19) . ? 
C9 C10 1.5360(18) . ? 
C10 C11 1.534(2) . ? 
C10 H10A 0.975(17) . ? 
C10 H10B 0.965(16) . ? 
C11 C12 1.503(2) . ? 
C11 H11A 0.964(17) . ? 
C11 H11B 0.966(19) . ? 
C12 C13 1.332(2) . ? 
C12 H12A 0.959(17) . ? 
C13 C18 1.509(2) . ? 
C13 C14 1.512(2) . ? 
C14 C15 1.537(2) . ? 
C14 H14A 0.987(18) . ? 
C14 H14B 0.988(19) . ? 
C15 H15A 0.949(19) . ? 
C15 H15B 0.988(19) . ? 
C16 H16A 0.94(2) . ? 
C16 H16B 1.00(2) . ? 
C16 H16C 0.98(2) . ? 
C17 H17A 0.99(2) . ? 
C17 H17B 0.97(2) . ? 
C17 H17C 0.99(2) . ? 
C18 H18A 0.91(2) . ? 
C18 H18B 0.95(2) . ? 
C18 H18C 0.98(3) . ? 
C19 H19A 0.95(2) . ? 
C19 H19B 0.98(2) . ? 
C19 H19C 0.954(19) . ? 
C20 C21 1.522(2) . ? 
C20 H20A 0.98(2) . ? 
C20 H20B 0.95(2) . ? 
C21 H21A 0.97(2) . ? 
C21 H21B 1.04(2) . ? 
C21 H21C 0.95(2) . ? 
C22 C23 1.525(2) . ? 
C22 H22A 0.97(2) . ? 
C22 H22B 0.934(19) . ? 
C23 H23A 0.98(2) . ? 
C23 H23B 0.95(2) . ? 
C23 H23C 0.95(2) . ? 
C24 C25 1.520(2) . ? 
C24 H24A 0.95(2) . ? 
C24 H24B 1.00(2) . ? 
C25 H25A 0.97(3) . ? 
C25 H25B 0.95(3) . ? 
C25 H25C 0.90(3) . ? 
  
loop_ 
 _geom_angle_atom_site_label_1 
 _geom_angle_atom_site_label_2 
 _geom_angle_atom_site_label_3 
 _geom_angle 
 _geom_angle_site_symmetry_1 
 _geom_angle_site_symmetry_3 
 _geom_angle_publ_flag 
O4 Si1 C22 110.75(6) . . ? 
O4 Si1 C24 105.00(6) . . ? 
C22 Si1 C24 108.11(7) . . ? 
O4 Si1 C20 111.69(6) . . ? 
C22 Si1 C20 111.24(7) . . ? 
C24 Si1 C20 109.79(8) . . ? 
C5 O2 C9 116.43(9) . . ? 
C7 O3 H3O 101.5(17) . . ? 
C8 O4 Si1 129.54(8) . . ? 
O1 C1 C6 119.70(12) . . ? 
O1 C1 C2 120.28(12) . . ? 
C6 C1 C2 119.41(11) . . ? 
C1 C2 C15 110.18(11) . . ? 
C1 C2 C16 102.06(11) . . ? 
C15 C2 C16 108.10(12) . . ? 
C1 C2 C3 112.86(10) . . ? 
C15 C2 C3 111.78(11) . . ? 
C16 C2 C3 111.37(12) . . ? 
C4 C3 C17 110.41(12) . . ? 
C4 C3 C2 113.08(11) . . ? 
C17 C3 C2 113.20(12) . . ? 
C4 C3 H3A 105.0(9) . . ? 
C17 C3 H3A 108.3(9) . . ? 
C2 C3 H3A 106.3(9) . . ? 
C5 C4 C3 111.50(10) . . ? 
C5 C4 H4A 109.1(10) . . ? 
C3 C4 H4A 110.4(10) . . ? 
C5 C4 H4B 108.2(10) . . ? 
C3 C4 H4B 108.9(10) . . ? 
H4A C4 H4B 108.8(14) . . ? 
O2 C5 C4 106.95(10) . . ? 
O2 C5 C6 109.81(10) . . ? 
C4 C5 C6 111.34(11) . . ? 
O2 C5 H5A 110.3(9) . . ? 
C4 C5 H5A 110.3(9) . . ? 
C6 C5 H5A 108.2(8) . . ? 
C5 C6 C1 112.01(10) . . ? 
C5 C6 C7 109.02(10) . . ? 
C1 C6 C7 113.28(11) . . ? 
C5 C6 H6A 107.9(10) . . ? 
C1 C6 H6A 105.0(10) . . ? 
C7 C6 H6A 109.4(10) . . ? 
O3 C7 C8 111.93(11) . . ? 
O3 C7 C6 112.89(11) . . ? 
C8 C7 C6 108.84(10) . . ? 
O3 C7 H7A 103.7(10) . . ? 
C8 C7 H7A 109.9(10) . . ? 
C6 C7 H7A 109.5(10) . . ? 
O4 C8 C7 112.62(10) . . ? 
O4 C8 C9 107.64(10) . . ? 
C7 C8 C9 111.90(10) . . ? 
O4 C8 H8A 109.9(9) . . ? 
C7 C8 H8A 108.0(8) . . ? 
C9 C8 H8A 106.6(8) . . ? 
O2 C9 C19 110.22(10) . . ? 
O2 C9 C10 104.58(10) . . ? 
C19 C9 C10 109.26(11) . . ? 
O2 C9 C8 109.57(10) . . ? 
C19 C9 C8 112.00(10) . . ? 
C10 C9 C8 110.95(10) . . ? 
C11 C10 C9 117.34(11) . . ? 
C11 C10 H10A 109.0(9) . . ? 
C9 C10 H10A 105.7(9) . . ? 
C11 C10 H10B 108.6(9) . . ? 
C9 C10 H10B 107.7(9) . . ? 
H10A C10 H10B 108.1(13) . . ? 
C12 C11 C10 113.83(11) . . ? 
C12 C11 H11A 111.5(10) . . ? 
C10 C11 H11A 110.9(9) . . ? 
C12 C11 H11B 108.6(11) . . ? 
C10 C11 H11B 106.4(11) . . ? 
H11A C11 H11B 105.1(14) . . ? 
C13 C12 C11 128.89(13) . . ? 
C13 C12 H12A 116.8(10) . . ? 
C11 C12 H12A 114.3(10) . . ? 
C12 C13 C18 124.25(14) . . ? 
C12 C13 C14 120.49(13) . . ? 
C18 C13 C14 115.22(13) . . ? 
C13 C14 C15 115.63(12) . . ? 
C13 C14 H14A 109.4(10) . . ? 
C15 C14 H14A 110.2(10) . . ? 
C13 C14 H14B 108.4(11) . . ? 
C15 C14 H14B 105.5(11) . . ? 
H14A C14 H14B 107.3(14) . . ? 
C14 C15 C2 117.71(12) . . ? 
C14 C15 H15A 107.6(11) . . ? 
C2 C15 H15A 106.9(11) . . ? 
C14 C15 H15B 109.8(11) . . ? 
C2 C15 H15B 107.4(11) . . ? 
H15A C15 H15B 106.8(15) . . ? 
C2 C16 H16A 109.0(12) . . ? 
C2 C16 H16B 113.2(12) . . ? 
H16A C16 H16B 109.0(17) . . ? 
C2 C16 H16C 109.7(12) . . ? 
H16A C16 H16C 106.8(17) . . ? 
H16B C16 H16C 109.0(16) . . ? 
C3 C17 H17A 110.4(11) . . ? 
C3 C17 H17B 111.6(12) . . ? 
H17A C17 H17B 108.9(16) . . ? 
C3 C17 H17C 111.6(11) . . ? 
H17A C17 H17C 106.2(16) . . ? 
H17B C17 H17C 108.1(16) . . ? 
C13 C18 H18A 112.8(15) . . ? 
C13 C18 H18B 112.3(14) . . ? 
H18A C18 H18B 112(2) . . ? 
C13 C18 H18C 110.0(15) . . ? 
H18A C18 H18C 102(2) . . ? 
H18B C18 H18C 106.6(19) . . ? 
C9 C19 H19A 109.5(12) . . ? 
C9 C19 H19B 111.5(11) . . ? 
H19A C19 H19B 108.2(16) . . ? 
C9 C19 H19C 110.0(11) . . ? 
H19A C19 H19C 109.2(16) . . ? 
H19B C19 H19C 108.3(15) . . ? 
C21 C20 Si1 114.01(12) . . ? 
C21 C20 H20A 108.3(12) . . ? 
Si1 C20 H20A 109.2(12) . . ? 
C21 C20 H20B 106.8(13) . . ? 
Si1 C20 H20B 111.7(13) . . ? 
H20A C20 H20B 106.4(17) . . ? 
C20 C21 H21A 110.5(13) . . ? 
C20 C21 H21B 112.2(13) . . ? 
H21A C21 H21B 109.1(18) . . ? 
C20 C21 H21C 111.9(14) . . ? 
H21A C21 H21C 105.3(19) . . ? 
H21B C21 H21C 107.5(19) . . ? 
C23 C22 Si1 113.70(11) . . ? 
C23 C22 H22A 109.7(11) . . ? 
Si1 C22 H22A 108.0(11) . . ? 
C23 C22 H22B 111.8(11) . . ? 
Si1 C22 H22B 108.4(11) . . ? 
H22A C22 H22B 104.9(15) . . ? 
C22 C23 H23A 111.8(12) . . ? 
C22 C23 H23B 110.8(12) . . ? 
H23A C23 H23B 108.7(17) . . ? 
C22 C23 H23C 113.4(12) . . ? 
H23A C23 H23C 106.3(17) . . ? 
H23B C23 H23C 105.5(17) . . ? 
C25 C24 Si1 116.07(12) . . ? 
C25 C24 H24A 109.4(12) . . ? 
Si1 C24 H24A 107.1(12) . . ? 
C25 C24 H24B 110.5(11) . . ? 
Si1 C24 H24B 107.9(11) . . ? 
H24A C24 H24B 105.3(16) . . ? 
C24 C25 H25A 111.7(14) . . ? 
C24 C25 H25B 109.9(16) . . ? 
H25A C25 H25B 107(2) . . ? 
C24 C25 H25C 112.8(18) . . ? 
H25A C25 H25C 112(2) . . ? 
H25B C25 H25C 103(2) . . ? 
  
loop_ 
 _geom_torsion_atom_site_label_1 
 _geom_torsion_atom_site_label_2 
 _geom_torsion_atom_site_label_3 
 _geom_torsion_atom_site_label_4 
 _geom_torsion 
 _geom_torsion_site_symmetry_1 
 _geom_torsion_site_symmetry_2 
 _geom_torsion_site_symmetry_3 
 _geom_torsion_site_symmetry_4 
 _geom_torsion_publ_flag 
C22 Si1 O4 C8 99.65(11) . . . . ? 
C24 Si1 O4 C8 -143.88(11) . . . . ? 
C20 Si1 O4 C8 -24.93(13) . . . . ? 
O1 C1 C2 C15 28.93(17) . . . . ? 
C6 C1 C2 C15 -160.04(11) . . . . ? 
O1 C1 C2 C16 -85.71(15) . . . . ? 
C6 C1 C2 C16 85.31(14) . . . . ? 
O1 C1 C2 C3 154.66(12) . . . . ? 
C6 C1 C2 C3 -34.32(16) . . . . ? 
C1 C2 C3 C4 41.23(15) . . . . ? 
C15 C2 C3 C4 166.09(11) . . . . ? 
C16 C2 C3 C4 -72.88(14) . . . . ? 
C1 C2 C3 C17 167.75(12) . . . . ? 
C15 C2 C3 C17 -67.39(15) . . . . ? 
C16 C2 C3 C17 53.64(16) . . . . ? 
C17 C3 C4 C5 176.18(12) . . . . ? 
C2 C3 C4 C5 -55.83(15) . . . . ? 
C9 O2 C5 C4 -179.93(10) . . . . ? 
C9 O2 C5 C6 59.13(13) . . . . ? 
C3 C4 C5 O2 -58.84(14) . . . . ? 
C3 C4 C5 C6 61.12(14) . . . . ? 
O2 C5 C6 C1 66.79(13) . . . . ? 
C4 C5 C6 C1 -51.46(14) . . . . ? 
O2 C5 C6 C7 -59.37(13) . . . . ? 
C4 C5 C6 C7 -177.63(10) . . . . ? 
O1 C1 C6 C5 -149.38(12) . . . . ? 
C2 C1 C6 C5 39.55(15) . . . . ? 
O1 C1 C6 C7 -25.56(16) . . . . ? 
C2 C1 C6 C7 163.37(11) . . . . ? 
C5 C6 C7 O3 -176.70(10) . . . . ? 
C1 C6 C7 O3 57.86(14) . . . . ? 
C5 C6 C7 C8 58.38(13) . . . . ? 
C1 C6 C7 C8 -67.06(13) . . . . ? 
Si1 O4 C8 C7 -75.54(13) . . . . ? 
Si1 O4 C8 C9 160.65(9) . . . . ? 
O3 C7 C8 O4 58.14(14) . . . . ? 
C6 C7 C8 O4 -176.38(10) . . . . ? 
O3 C7 C8 C9 179.56(10) . . . . ? 
C6 C7 C8 C9 -54.96(13) . . . . ? 
C5 O2 C9 C19 69.73(13) . . . . ? 
C5 O2 C9 C10 -172.95(10) . . . . ? 
C5 O2 C9 C8 -53.96(13) . . . . ? 
O4 C8 C9 O2 175.19(9) . . . . ? 
C7 C8 C9 O2 50.95(13) . . . . ? 
O4 C8 C9 C19 52.57(14) . . . . ? 
C7 C8 C9 C19 -71.68(13) . . . . ? 
O4 C8 C9 C10 -69.83(13) . . . . ? 
C7 C8 C9 C10 165.93(10) . . . . ? 
O2 C9 C10 C11 72.58(13) . . . . ? 
C19 C9 C10 C11 -169.44(11) . . . . ? 
C8 C9 C10 C11 -45.47(15) . . . . ? 
C9 C10 C11 C12 -56.68(16) . . . . ? 
C10 C11 C12 C13 135.54(15) . . . . ? 
C11 C12 C13 C18 4.8(2) . . . . ? 
C11 C12 C13 C14 -177.54(13) . . . . ? 
C12 C13 C14 C15 109.20(16) . . . . ? 
C18 C13 C14 C15 -72.97(17) . . . . ? 
C13 C14 C15 C2 -60.83(18) . . . . ? 
C1 C2 C15 C14 79.96(15) . . . . ? 
C16 C2 C15 C14 -169.28(13) . . . . ? 
C3 C2 C15 C14 -46.37(17) . . . . ? 
O4 Si1 C20 C21 155.84(13) . . . . ? 
C22 Si1 C20 C21 31.53(15) . . . . ? 
C24 Si1 C20 C21 -88.10(14) . . . . ? 
O4 Si1 C22 C23 46.93(13) . . . . ? 
C24 Si1 C22 C23 -67.61(13) . . . . ? 
C20 Si1 C22 C23 171.77(11) . . . . ? 
O4 Si1 C24 C25 54.07(18) . . . . ? 
C22 Si1 C24 C25 172.34(17) . . . . ? 
C20 Si1 C24 C25 -66.14(18) . . . . ? 
  
loop_ 
 _geom_hbond_atom_site_label_D 
 _geom_hbond_atom_site_label_H 
 _geom_hbond_atom_site_label_A 
 _geom_hbond_distance_DH 
 _geom_hbond_distance_HA 
 _geom_hbond_distance_DA 
 _geom_hbond_angle_DHA 
 _geom_hbond_site_symmetry_A 
O3 H3O O1  0.93(3) 1.88(3) 2.7077(15) 146(2) . 
  
_diffrn_measured_fraction_theta_max    0.992 
_diffrn_reflns_theta_full              27.53 
_diffrn_measured_fraction_theta_full   0.992 
_refine_diff_density_max    0.518 
_refine_diff_density_min   -0.149 
_refine_diff_density_rms    0.049 
